# Supplementary material for: Fluid-powered rotation-contact separation hybrid triboelectric nanogenerator for heavy metal ion removal and corrosion protection
Source: Royal Society of Chemistry journal article supplement (doi:10.1039/d5ta07336g), 2025-12-24
Supplement: d5ta07336g1.pdf [file d5ta07336g1.pdf]

## Supporting Information

### **Fluid-powered rotation-contact separation hybrid triboelectric nanogenerator for heavy metal ion removal and corrosion protection**

**Xinyi Ji <sup>a</sup>, Yukun Liu <sup>a</sup>, Lina Zhou <sup>a</sup>, Zekang Zhang <sup>a</sup>, Chao Yang <sup>b</sup>, Zhenyuan**

**Xu <sup>a</sup>, Dongzhi Zhang <sup>a,\*</sup>**

<sup>a</sup> State Key Laboratory of Chemical Safety, College of Control Science and Engineering, China University of Petroleum (East China), Qingdao 266580, China

<sup>b</sup> Technology Inspection Center of Shengli Oilfield, China Petroleum & Chemical Corporation, Dongying 257000, China

\*Corresponding author: Dongzhi Zhang

E-mail address: dzzhang@upc.edu.cn

Tel: +86-532-86982928

Fax: +86-532-86981335

## Figure captions

**Fig. S1.** (a) RCS-TENG front view. (b) RCS-TENG rear view. (c) RCS-TENG top view.

**Fig. S2.** Contact Angle diagram of Ecoflex/ZnS material.

**Fig. S3.** (a) SEM image of the Ecoflex/ZnS composite. (b) The Zn element in Ecoflex/ZnS composite. (c) The S element in Ecoflex/ZnS composite.

**Fig. S4.** Graph of the relationship between the output and flow velocity of RCS-TENG and the error range of the average values of multiple measurements.

**Fig. S5.** (a) Long term stability of PG-TENG output voltage. (b) Long term stability of output current of PG-TENG.

**Fig. S6.** Comparison of direct charging and charging of 1 mF capacitors via EMM circuitry.

**Fig. S7.** (a) The relationship between the removal rate and time of Pb at different concentrations. (b) Physical image of Cd deposited on cathode titanium plate at different times.

**Fig. S8.** (a) The relationship between the removal rate of Cu and time at different spacings between the anode and cathode of the electrode plate; (b) The relationship between the removal rate of Pb and time at different spacings between the anode and cathode of the electrode plate; (c) The relationship between the removal rate of Cd and time at different spacings between the anode and cathode of the electrode plate.

**Fig. S9.** (a) EDS characterization of Cu adherents on titanium plate electrodes. (b) EDS characterization of Pb adherents on titanium plate electrodes. (c) EDS

characterization of Cd adherents on titanium plate electrodes.

### **Supporting Movie**

**Movie 1.** LEDs with "TENG" mark are lit by RCS-TENG.

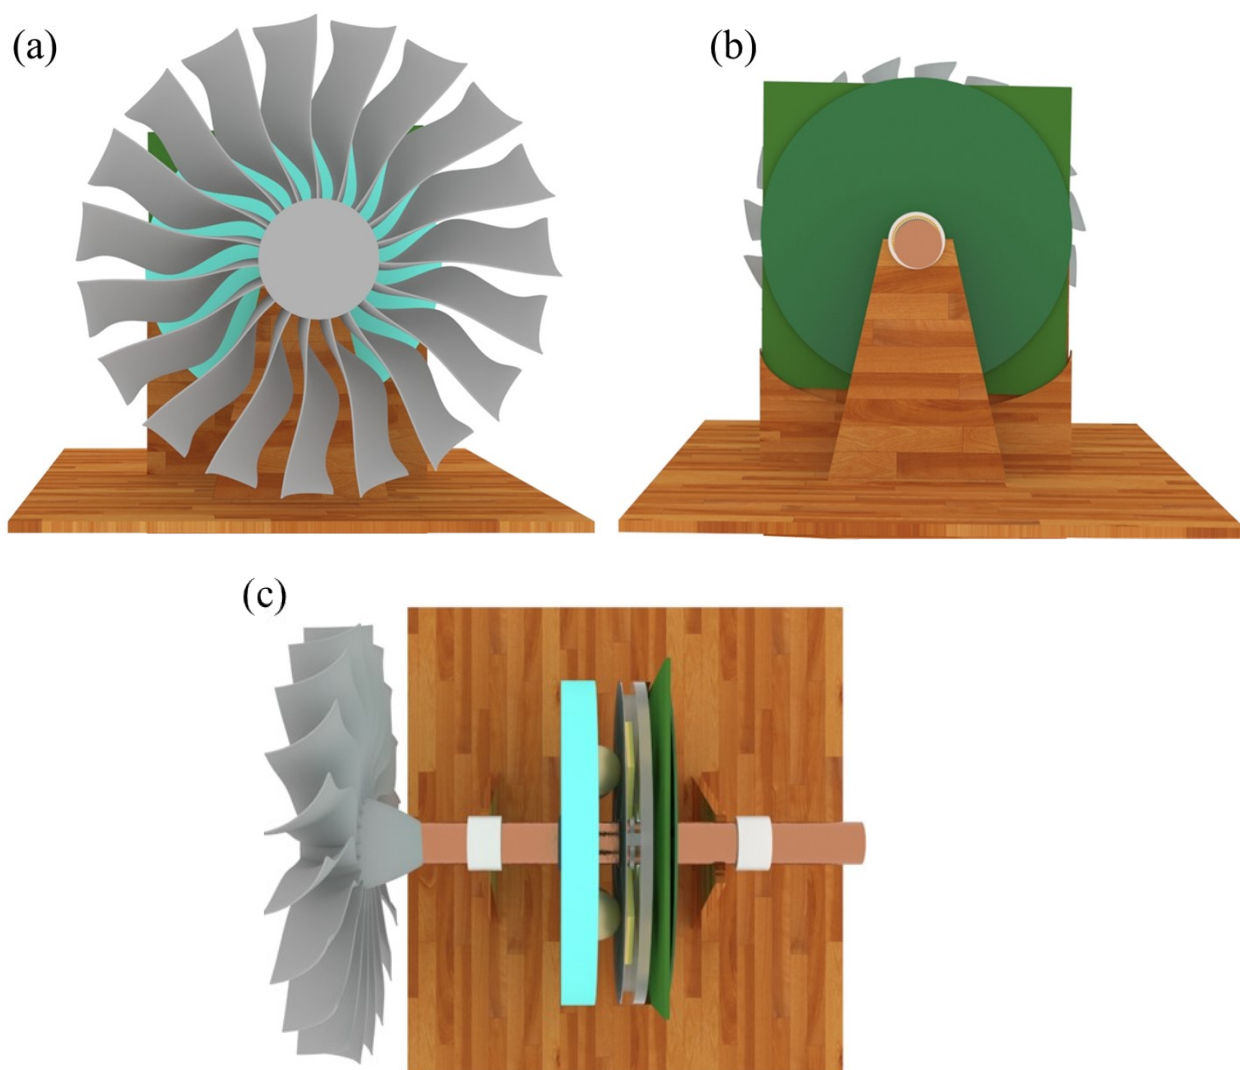

**Fig. S1.** (a) RCS-TENG front view. (b) RCS-TENG rear view. (c) RCS-TENG top view.

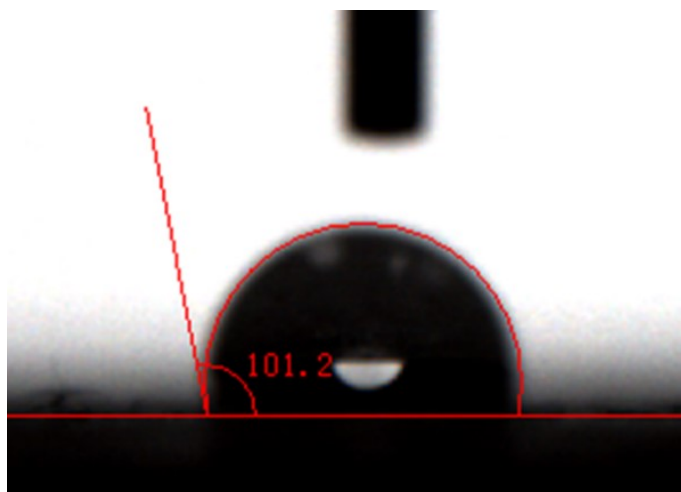

**Fig. S2.** Contact Angle diagram of Ecoflex/ZnS material.

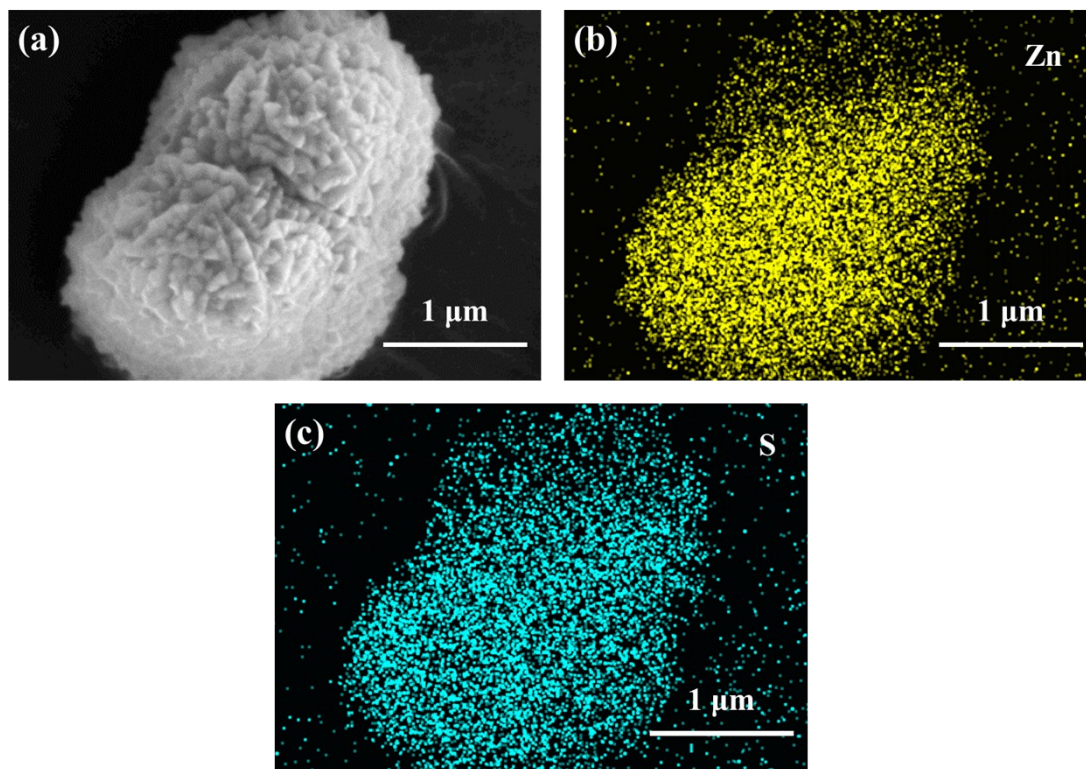

**Fig. S3.** (a) SEM image of the Ecoflex/ZnS composite. (b) The Zn element in Ecoflex/ZnS composite. (c) The S element in Ecoflex/ZnS composite.

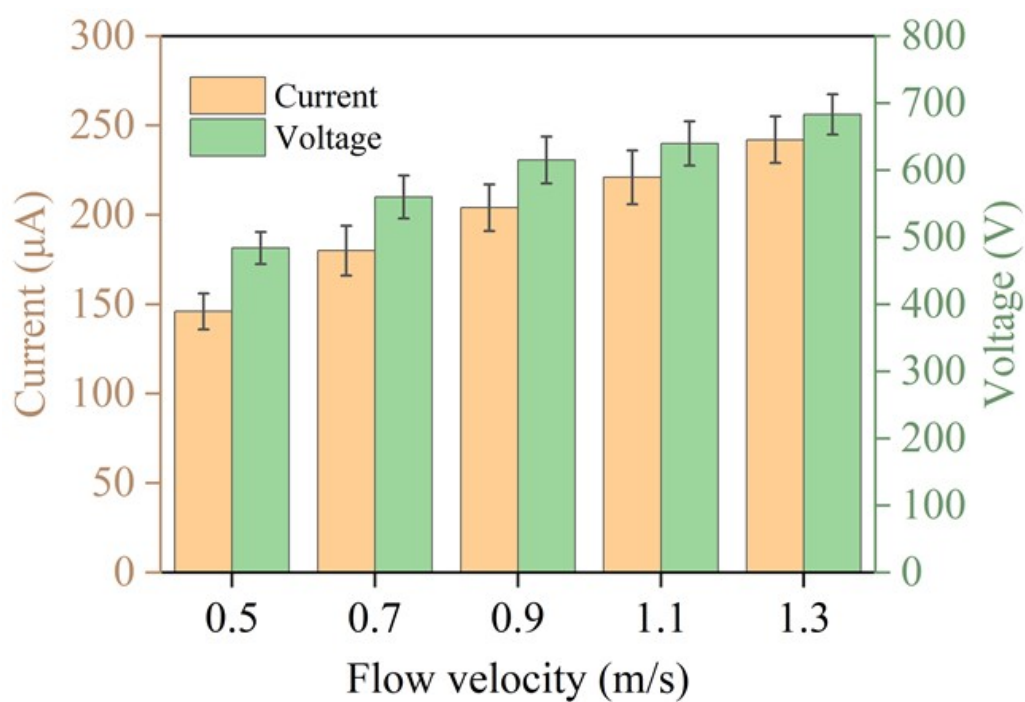

**Fig. S4.** Graph of the relationship between the output and flow velocity of RCS-TENG and the error range of the average values of multiple measurements.

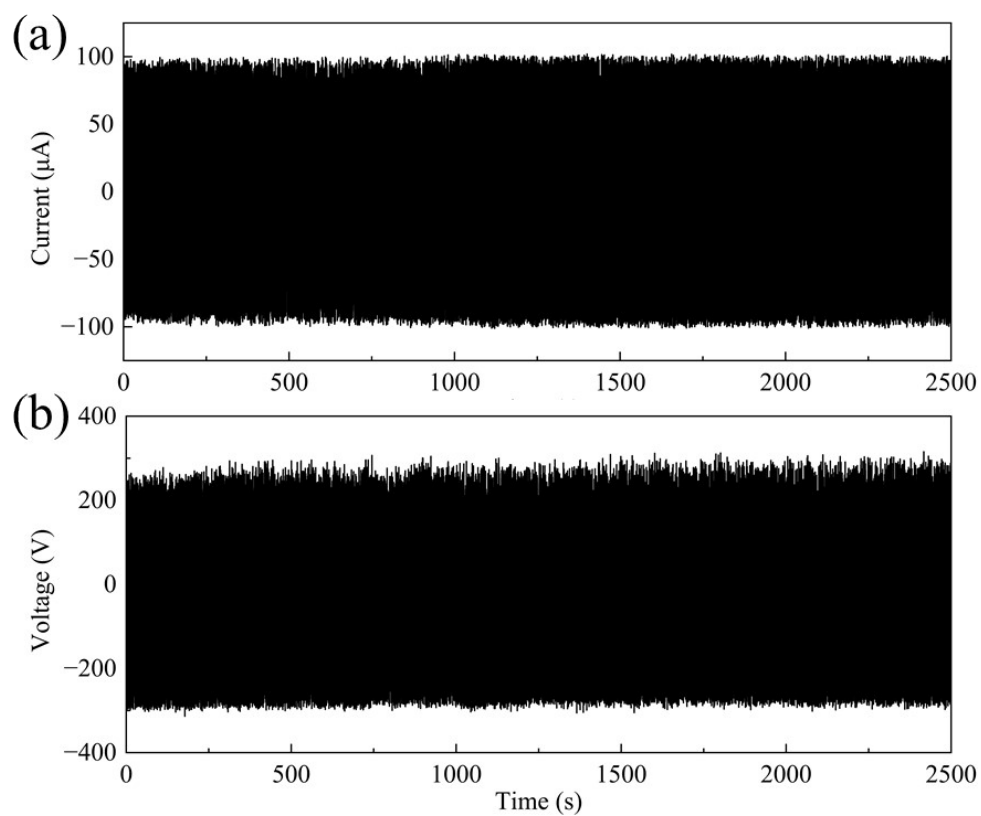

**Fig. S5.** (a) Long term stability of PG-TENG output voltage. (b) Long term stability of output current of PG-TENG.



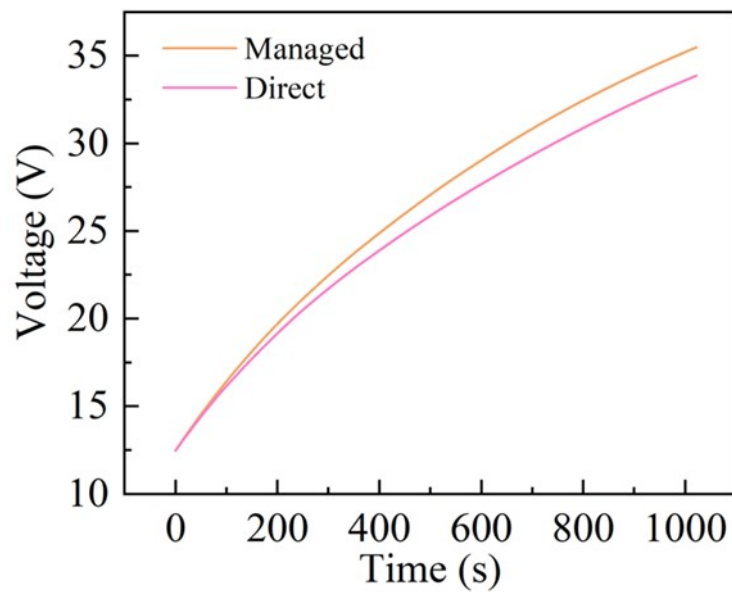

**Fig. S6.** Comparison of direct charging and charging of 1 mF capacitors via EMM circuitry.

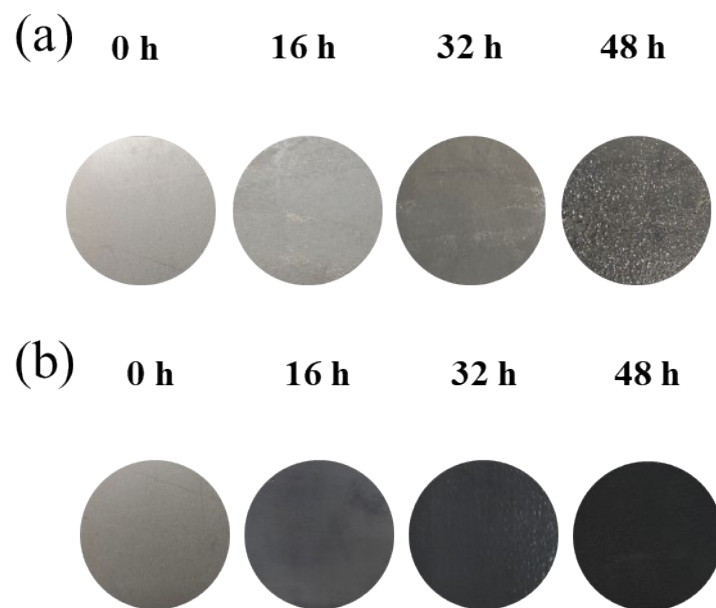

**Fig. S7.** (a) The relationship between the removal rate and time of Pb at different concentrations. (b) Physical image of Cd deposited on cathode titanium plate at different times.

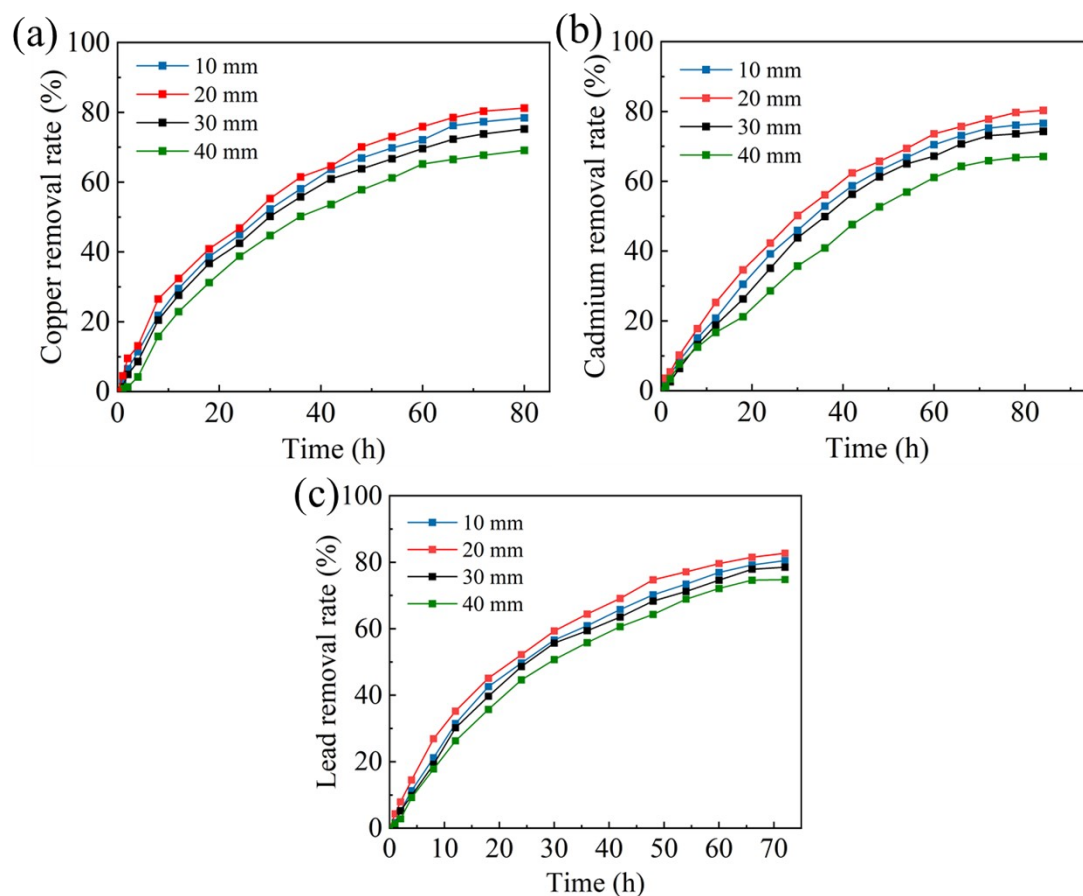

**Fig. S8.** (a) The relationship between the removal rate of Cu and time at different spacings between the anode and cathode of the electrode plate; (b) The relationship between the removal rate of Pb and time at different spacings between the anode and cathode of the electrode plate; (c) The relationship between the removal rate of Cd and time at different spacings between the anode and cathode of the electrode plate.

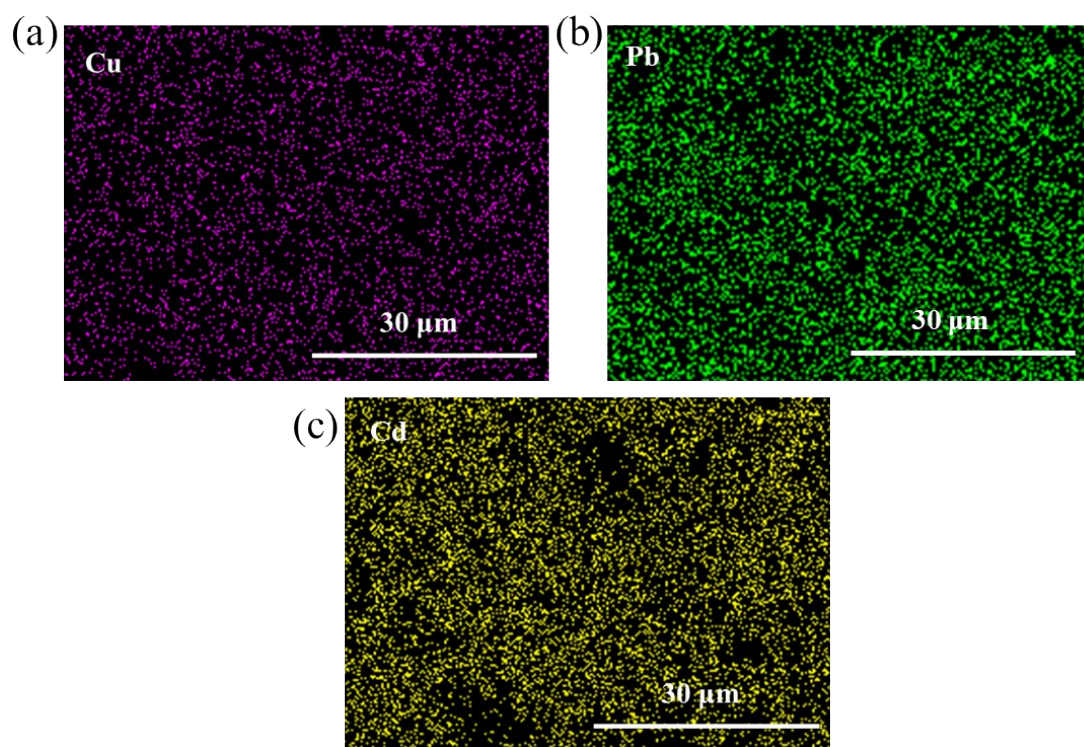

**Fig. S9.** (a) EDS characterization of Cu adherents on titanium plate electrodes. (b) EDS characterization of Pb adherents on titanium plate electrodes. (c) EDS characterization of Cd adherents on titanium plate electrodes.
